# Supplementary material
Source: Springer Nature journal article supplement (https://www.springermedizin.de/resource/supplementary/13000_2012_659_MOESM4_ESM.pdf/9624864)

Study  
ID

OR<sub>95%</sub> CI)

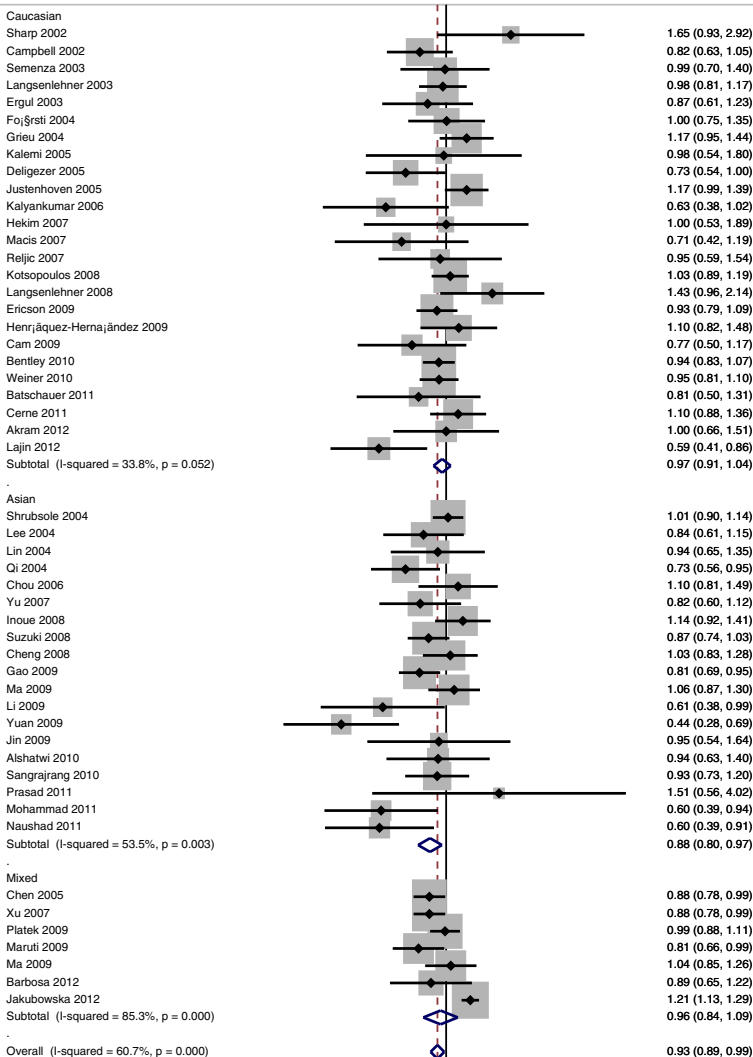

NOTE: Weights are from random effects analysis

.5

1

5

Supplement: MOESM4 [file 9624864]
